# Supplementary material for: Impact of aeration change and beam arrangement on the robustness of proton plans
Source: PubMed Central journal article supplement (PMC6414139; doi:10.1002/acm2.12503), 2019-02-12
Supplement: ACM2-20-14-s001.pdf [file ACM2-20-14-s001.pdf]

## Supplementary materials

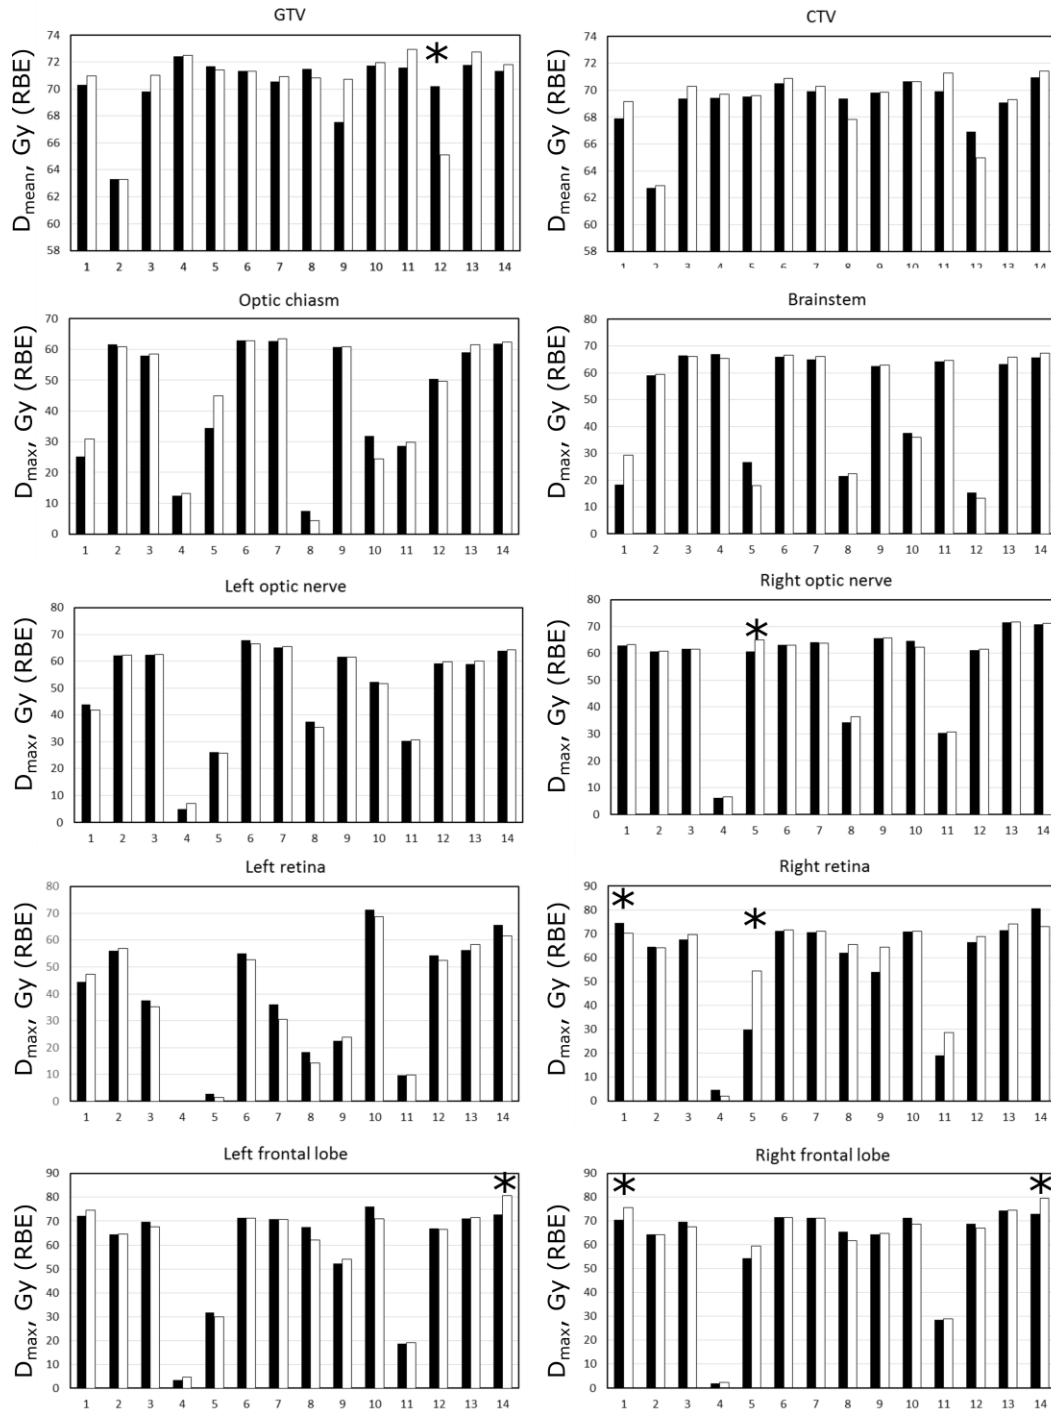

**Figure S1.** Results from two plans, based on planning CT (black columns) and on repeat CT (white columns). D<sub>mean</sub> for the targets and D<sub>max</sub> for the critical structures are shown for all patients. The patients with clinically significant change of the dose are marked with an asterisk.

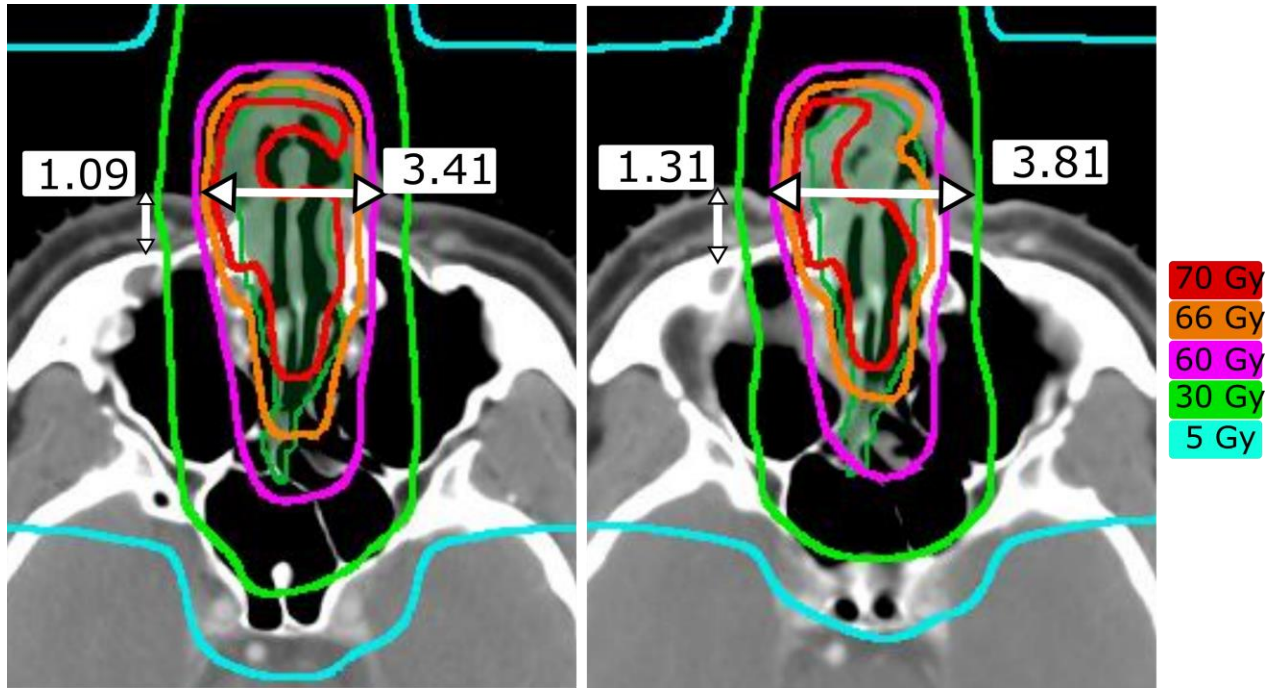

**Figure S2.** Comparison of dose distributions calculated on planning CT (left) and repeat CT (right). Facial swelling at the time of rescan shown by measuring lines (with the measures in cm) causes a redistribution of the high dose in the upper part of the CTV shown by a green filled area.
